# Supplementary material
Source: publisher site journal article supplement (https://www.spandidos-publications.com/4947/downloadSupplementary)
Supplement: Supplementary file 1 [file downloadSupplementary]

Table SI. List of genes tested in the NIPD Genetics pan-cancer tumor profile assay.

| Single Nucleotide Variants / Insertions and Deletions                                                                                                                                                                                                                                                                                                                                                                                                      | Copy Number Alterations                                                                                                   | Rearrangements                                            |
|------------------------------------------------------------------------------------------------------------------------------------------------------------------------------------------------------------------------------------------------------------------------------------------------------------------------------------------------------------------------------------------------------------------------------------------------------------|---------------------------------------------------------------------------------------------------------------------------|-----------------------------------------------------------|
| AKT1, ALK, APC, AR, ARAF, ATM, ATRX, BARD1, BRAF, BRCA1, BRCA2, BRIP1, CDH1, CHEK2, CIC, CTNNB1, DDR2, DICER1, EGFR, ERBB2, ERBB3, ERBB4, ESR1, FBXW7, FLT3, FOXA1, FOXL2, FUBP1, GATA3, GNA11, GNAQ, GNAS, H3F3A, IDH1, IDH2, JAK2, KEAP1, KIT, KRAS, MAP2K1, MAP3K1, MET, MLH1, MRE11A, MSH2, MSH6, MTOR, NBN, NF1, NPM1, NRAS, NTRK1, PALB2, PDGFRA, PIK3CA, PIK3CB, PMS2, POLE, PTEN, RAD51C, RAD51D, RAF1, RET, RUNX1, SMAD4, SPOP, STK11, TERT, TP53 | 1p/19q codeletion, AR, CDKN2A, EGFR, ERBB2, ESR1, FGFR1, FGFR2, FGFR3, KIT, KRAS, MET, MYC, MYCN, PIK3CA, PTEN, RB1, TP53 | ALK, BRAF, FGFR3, NTRK1, NTRK2, NTRK3, RET, ROS1, TMPRSS2 |

Table SII. List of 33 structural variants identified by the comprehensive pan-cancer tumour profile assay.

| Sample ID | Chr   | Start     | Stop      | Gene               | Structural Variant type   |
|-----------|-------|-----------|-----------|--------------------|---------------------------|
| GB001     | chr9  | 21967752  | 21975097  | <i>CDKN2A</i>      | Copy number deletion      |
| GB005     | chr4  | 55524085  | 55606881  | <i>KIT</i>         | Copy number amplification |
| GB006     | chr10 | 89622870  | 89731687  | <i>PTEN</i>        | Copy number deletion      |
| GB026     | chr9  | 21967752  | 21975097  | <i>CDKN2A</i>      | Copy number deletion      |
| GB038     | chr9  | 21967752  | 21975097  | <i>CDKN2A</i>      | Copy number deletion      |
| GB055     | chr9  | 21967752  | 21975097  | <i>CDKN2A</i>      | Copy number deletion      |
| GB057     | chr4  | 1795039   | 1810599   | <i>FGFR3</i>       | Copy number amplification |
| GB057     | chr4  | 1808674   | 1739592   | <i>FGFR3-TACC3</i> | Rearrangement             |
| GB060     | chr8  | 128748330 | 128753674 | <i>MYC</i>         | Copy number amplification |
| GB060     | chr10 | 89622870  | 89731687  | <i>PTEN</i>        | Copy number deletion      |
| GB062     | chr9  | 21967752  | 21975097  | <i>CDKN2A</i>      | Copy number deletion      |
| GB062     | chr7  | 55086794  | 55279321  | <i>EGFR</i>        | Copy number amplification |
| GB067     | chr9  | 21967752  | 21975097  | <i>CDKN2A</i>      | Copy number deletion      |
| GB090     | chr7  | 55086794  | 55279321  | <i>EGFR</i>        | Copy number amplification |
| GB095     | chr9  | 21967752  | 21975097  | <i>CDKN2A</i>      | Copy number deletion      |
| GB095     | chr7  | 55086794  | 55279321  | <i>EGFR</i>        | Copy number amplification |
| GB100     | chr7  | 55086794  | 55279321  | <i>EGFR</i>        | Copy number amplification |
| GB101     | chr9  | 21967752  | 21975097  | <i>CDKN2A</i>      | Copy number deletion      |
| GB112     | chr9  | 21967752  | 21975097  | <i>CDKN2A</i>      | Copy number deletion      |
| GB112     | chr7  | 55086794  | 55279321  | <i>EGFR</i>        | Copy number amplification |
| GB114     | chr9  | 21967752  | 21975097  | <i>CDKN2A</i>      | Copy number deletion      |
| GB117     | chr9  | 21967752  | 21975097  | <i>CDKN2A</i>      | Copy number deletion      |
| GB117     | chr7  | 55086794  | 55279321  | <i>EGFR</i>        | Copy number amplification |
| GB117     | chr8  | 128748330 | 128753674 | <i>MYC</i>         | Copy number amplification |
| GB127     | chr9  | 21967752  | 21975097  | <i>CDKN2A</i>      | Copy number deletion      |
| GB127     | chr7  | 55086794  | 55279321  | <i>EGFR</i>        | Copy number amplification |
| GB129     | chr9  | 21967752  | 21975097  | <i>CDKN2A</i>      | Copy number deletion      |
| GB132     | chr9  | 21967752  | 21975097  | <i>CDKN2A</i>      | Copy number deletion      |
| GB132     | chr7  | 55086794  | 55279321  | <i>EGFR</i>        | Copy number amplification |
| GB137     | chr9  | 21967752  | 21975097  | <i>CDKN2A</i>      | Copy number deletion      |
| GB137     | chr7  | 55086794  | 55279321  | <i>EGFR</i>        | Copy number amplification |
| GB137     | chr10 | 89622870  | 89731687  | <i>PTEN</i>        | Copy number deletion      |
| GB141     | chr7  | 55086794  | 55279321  | <i>EGFR</i>        | Copy number amplification |
